# Supplementary material for: A semi-automated quality assurance tool for cardiovascular magnetic resonance imaging: application to outlier detection, artificial intelligence evaluation and trainee feedback
Source: Springer Nature journal article supplement (doi:10.1186/s12911-025-03271-6), 2025-12-02
Supplement: MOESM6 [file 12911_2025_3271_MOESM6_ESM.pdf › 12911_2025_3271_MOESM6_ESM.pdf]

## Clinical Parameter Means and Tolerance Ranges

| Clinical Result (mean±std) | Reader1_1   | Reader1_2   | Diff(Reader1_1, Reader1_2) (Mean Diff±CI), ±Tol range |
|----------------------------|-------------|-------------|-------------------------------------------------------|
| 4CV_RAESAREA [cm^2]        | 14.0 (3.8)  | 14.0 (4.1)  | 0.0 (0.8) (-0.2, 0.3), ±nan                           |
| 4CV_RAEDAREA [cm^2]        | 22.6 (5.2)  | 22.4 (5.0)  | 0.1 (0.7) (-0.1, 0.4), ±1.0                           |
| 4CV_RAESV [ml]             | 41.2 (16.7) | 40.9 (17.7) | 0.3 (3.4) (-1.0, 1.5), ±nan                           |
| 4CV_RAEDV [ml]             | 76.7 (27.2) | 75.7 (25.5) | 1.0 (4.3) (-0.5, 2.6), ±nan                           |
| 4CV_LAESAREA [cm^2]        | 13.4 (4.4)  | 13.3 (4.3)  | 0.0 (0.9) (-0.3, 0.4), ±nan                           |
| 4CV_LAEDAREA [cm^2]        | 23.5 (4.6)  | 23.6 (4.8)  | -0.1 (0.9) (-0.5, 0.2), ±2.1                          |
| 4CV_LAESV [ml]             | 31.8 (18.2) | 31.4 (17.7) | 0.4 (3.5) (-0.9, 1.6), ±nan                           |
| 4CV_LAEDV [ml]             | 78.0 (26.8) | 78.8 (28.1) | -0.8 (5.4) (-2.8, 1.2), ±nan                          |
| 2CV_LAESAREA [cm^2]        | 12.2 (5.5)  | 11.9 (5.6)  | 0.3 (0.7) (0.0, 0.5), ±nan                            |
| 2CV_LAEDAREA [cm^2]        | 20.7 (5.5)  | 20.8 (5.6)  | -0.0 (0.7) (-0.3, 0.2), ±2.0                          |
| 2CV_LAESV [ml]             | 32.1 (24.4) | 31.4 (25.2) | 0.7 (3.1) (-0.4, 1.8), ±nan                           |
| 2CV_LAEDV [ml]             | 67.8 (28.3) | 67.9 (29.3) | -0.1 (4.1) (-1.6, 1.4), ±nan                          |
| BIPLANE_LAESV [ml]         | 34.6 (19.9) | 34.1 (19.7) | 0.5 (2.7) (-0.5, 1.5), ±nan                           |
| BIPLANE_LAEDV [ml]         | 76.1 (24.0) | 76.5 (25.4) | -0.4 (3.1) (-1.5, 0.7), ±nan                          |
| LAESP_4CV [#]              | 4.3 (9.9)   | 2.3 (7.3)   | 0.2 (0.4) (0.1, 0.4), ±nan                            |
| LAEDP_4CV [#]              | 13.5 (1.6)  | 13.6 (1.7)  | 0.2 (0.4) (0.1, 0.4), ±nan                            |
| LAESP_2CV [#]              | 4.3 (9.9)   | 2.3 (7.3)   | 0.2 (0.4) (0.1, 0.4), ±nan                            |
| LAEDP_2CV [#]              | 13.5 (1.6)  | 13.6 (1.7)  | 0.2 (0.4) (0.1, 0.4), ±nan                            |
| RAESP_4CV [#]              | 7.3 (12.3)  | 5.2 (10.8)  | 0.4 (0.6) (0.2, 0.7), ±nan                            |
| RAEDP_4CV [#]              | 13.2 (1.8)  | 13.2 (1.7)  | 0.3 (0.5) (0.1, 0.5), ±nan                            |

Table. 1 This table shows the clinical parameter names in the first column. The other columns show statistics concerning the parameters. The first and second readers' means (stds) are shown in the second and third column, respectively. The mean and std of the differences between both readers is presented in the fourth column. The mean difference of both readers ± 95% confidence intervals are shown in parentheses with ±tolerance ranges thereafter. This provides information on whether the 95% estimate of the mean difference between both readers is within an acceptable limit.

# Atrial Area Differences

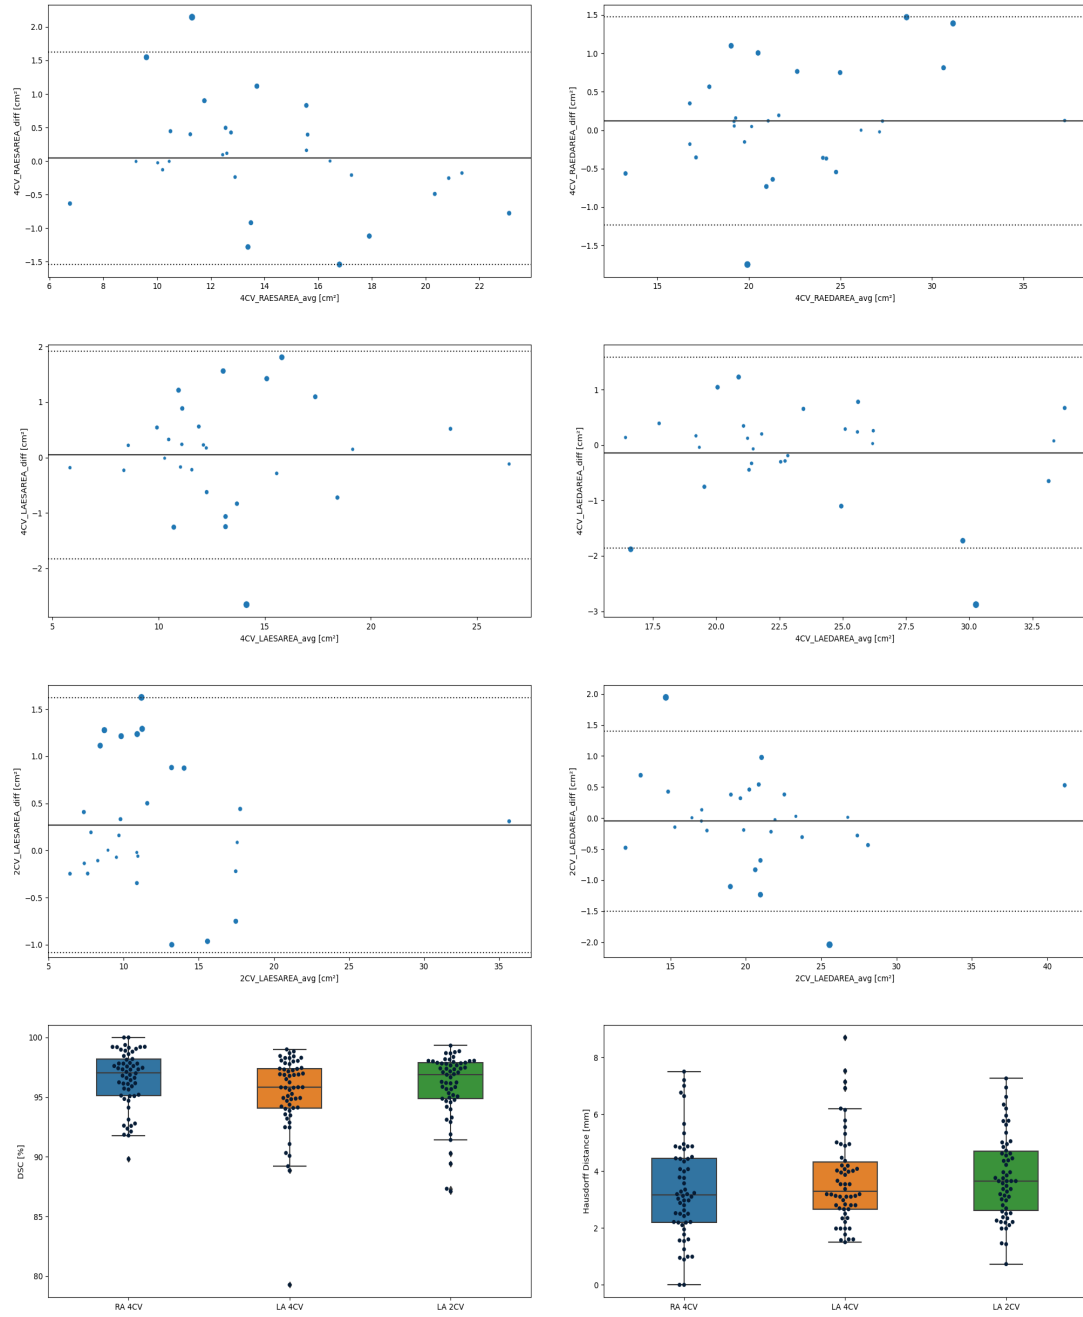

Fig. 1 Area Differences for LA & RA: The first row presents Bland-Altman plots for the 4CV RA areas in ES and ED. The second row shows BA plots for the 4CV LA areas. The third row shows 2CV LA areas. The last row contains Dice value boxplots per contour on the left and Hausdorff distance boxplots on the right. Legend: ES: End-systole, ED: End-diastole, CV: Chamber View, LA: Left Atrium, RA: Right Atrium, Dice: Dice similarity coefficient

## Confidence Intervals and Tolerance Ranges

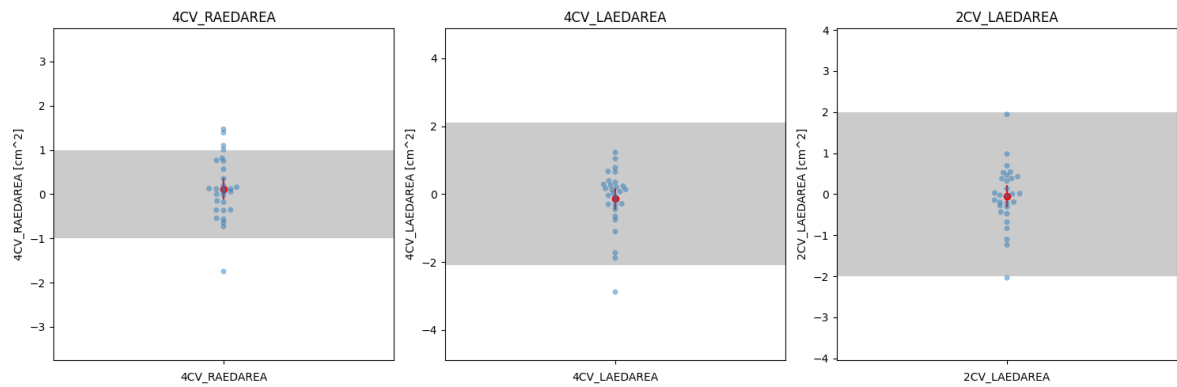

Fig. 2 Confidence Intervals and Tolerance Ranges of Atria Areas: Each subfigure references an atrial area, from left to right, 4CV RA, 4CV LA, 2CV LA. Tolerance intervals are shown as gray bars and represent  $\pm 1.96$  standard deviation of an expert intrareader deviation. The 95% confidence intervals of the mean area difference is represented as an error bar in red. Individual area differences per contour are plotted in blue. Legend: CV: Chamber view, RA: Right Atrium, LA: Left Atrium

## **Qualitative Figures added during Manual Inspection**

The following PDF pages reference figures, which were manually selected by the investigator and added to this report manually. Every figure has a title and comments that the investigator typed for elaboration.

Title: Unreasonably Large Outlier... 4CV\_RAEDAREA\_bland\_altman

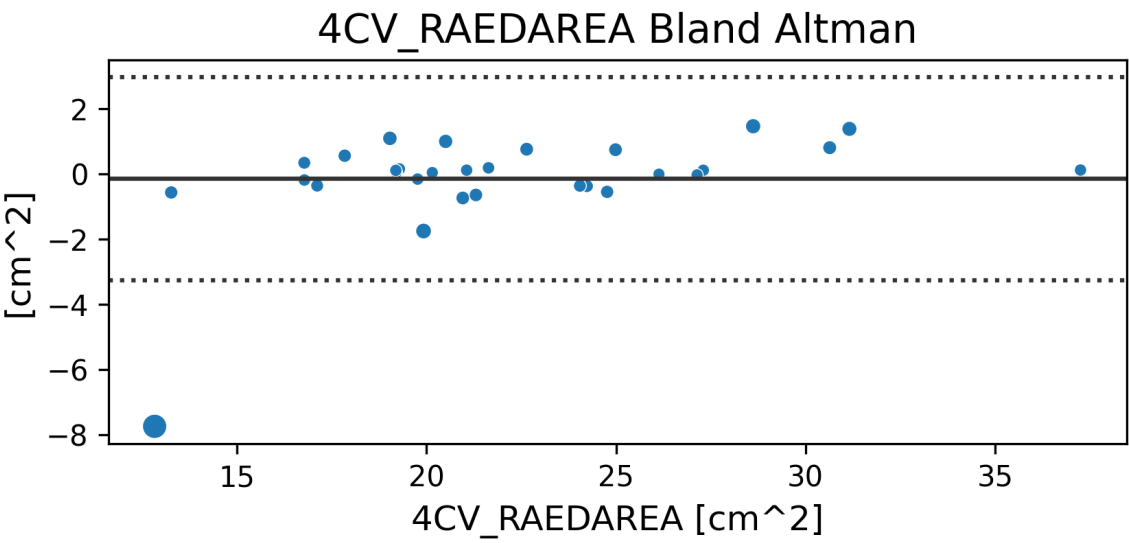

Checking for overlooked contours in RA ED...

Title: Paired Boxplot WITHOUT the outlier 4CV\_RAEDAREA\_paired\_boxplot

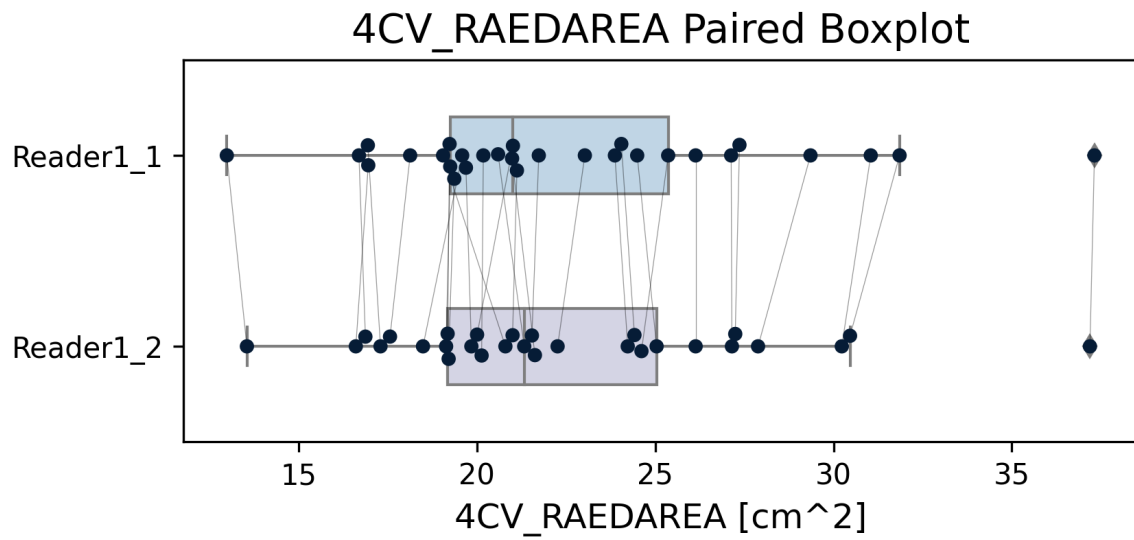

Reason for exclusion was indeed overlooked atria in RA ED by Reader\_1\_2

Title: Otherwise, well within tolerance range. 4CV\_LAEDAREA\_bland\_altman

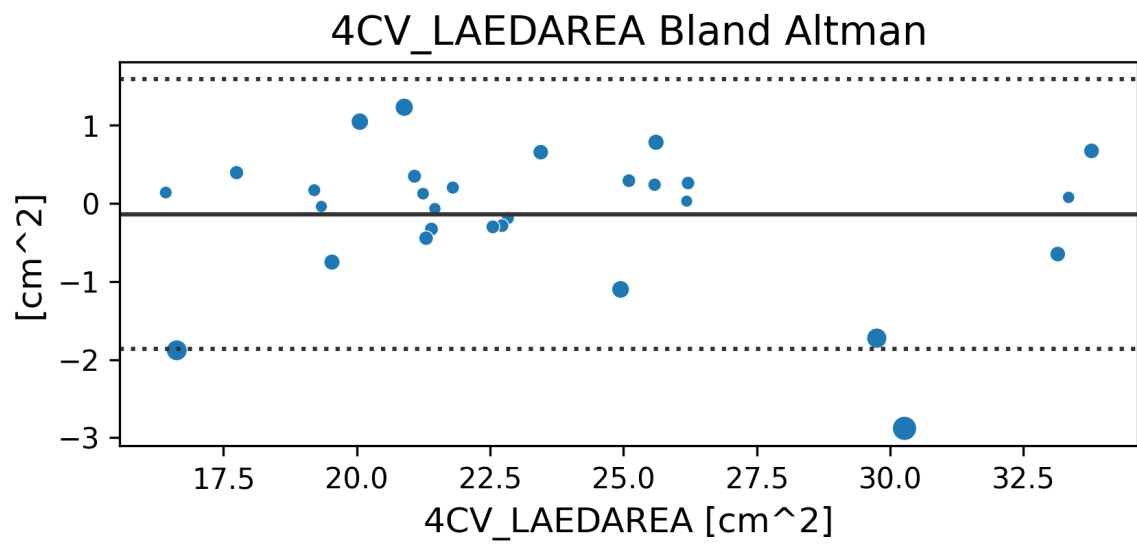

Inspecting largest outlier

Title: Large atrium Atria\_HCM\_24\_ category: LAX 4CV LAED, slice: 0 annotation comparison

Category: LAX 4CV LAED, slice: 0

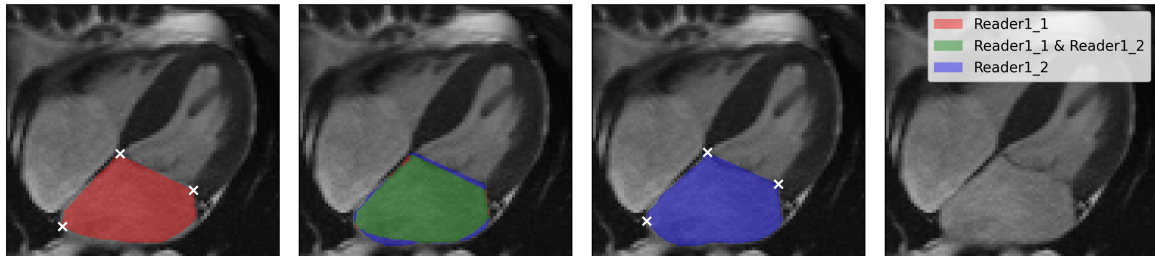

Otherwise very similar contours (DSC>93%)



Title: LA 2CV also excellent 2CV\_LAEDAREA\_bland\_altman

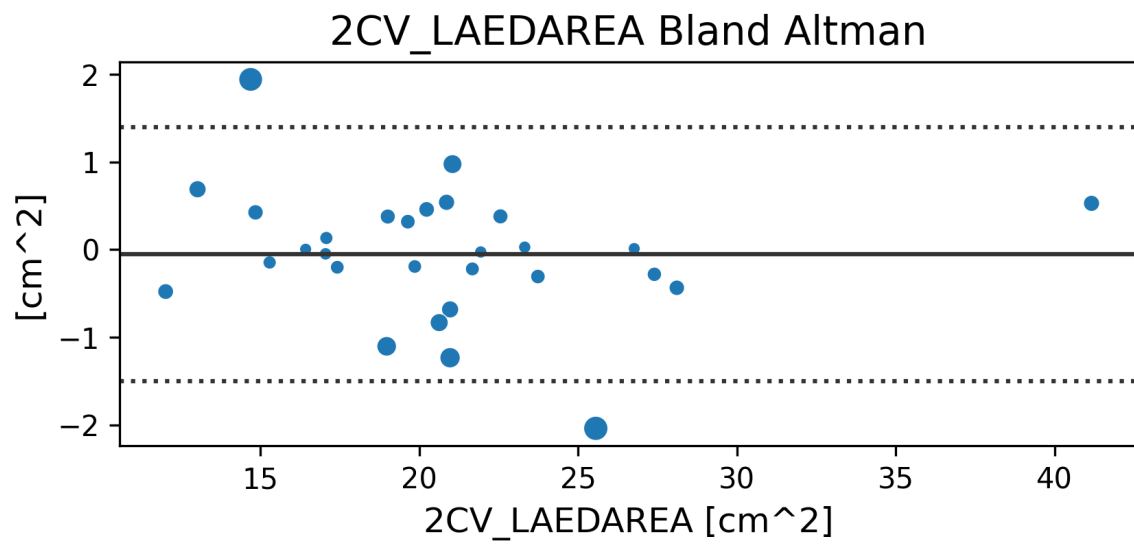

Checking two largest outliers... (top & bottom)

Title:      Larger difference, but    Atria\_VOL\_18\_   category: LAX 2CV LAED, slice: 0   annotation comparison

Category: LAX 2CV LAED, slice: 0

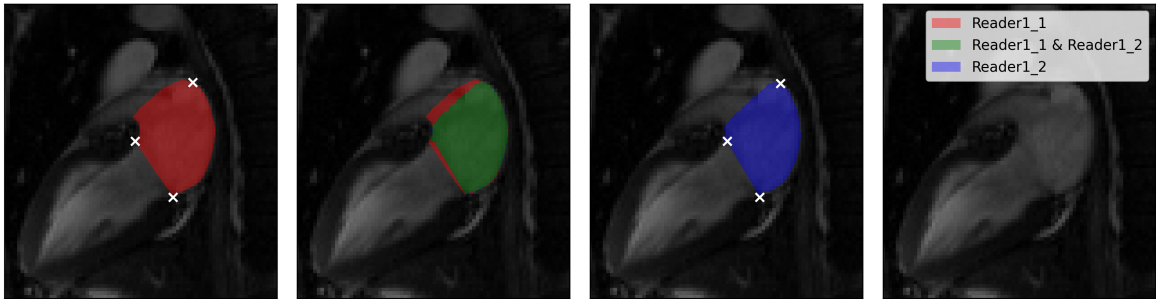

still highly similar contours (DSC approx 92%)

Title: Large atrium Atria\_MD\_9\_ category: LAX 2CV LAED, slice: 0 annotation comparison

Category: LAX 2CV LAED, slice: 0

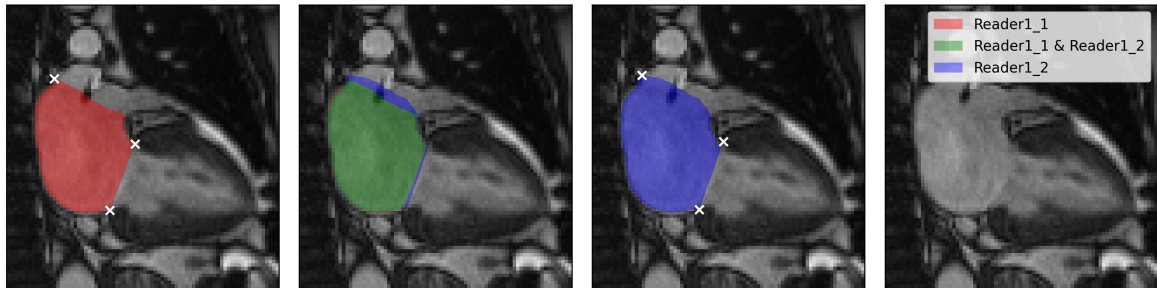

Otherwise very similar contours...
